# Supplementary material
Source: publisher figshare collection journal article supplement (https://acs.figshare.com/ndownloader/files/4313398)
Supplement: Supplementary file 1 [file 4313398]

# Substitution of Thiophene and Pyrrole Oligomers with Macrocyclic Endcaps and the Colorimetric Detection of Hg(II)

Mariappan Kadarkaraisamy, Soudsakhone Thammavongkeo,

Prem N. Basa, Gerald Caple and Andrew G. Sykes\*

*Department of Chemistry, University of South Dakota, Vermillion, SD 57069*

*asykes@usd.edu*

## Experimental

Elemental analyses were conducted using an Exeter CE-440 Elemental Analyzer. 200 MHz  $^1\text{H}$  and 75 MHz  $^{13}\text{C}$  (Varian) spectra were obtained at room temperature in  $\text{CDCl}_3$ . Anthracenone **1** was synthesized by a previously reported procedure.<sup>8</sup> 3-thiophenacetonitrile, 2,2'-bithiophene, 2,2',5',2''-terthiophene, and N-(2-cyanoethyl)-pyrrole were purchased from Aldrich and used without further purification. Melting points were determined in an open capillary and are uncorrected. Low solubility in  $\text{CDCl}_3$  and high signal to noise ratio for **4-6** restricted observation of  $^{13}\text{C}$  resonances for carbons with no hydrogen atoms attached.  $^1\text{H}$  NMR spectra of the aromatic region for compounds **3-6** have been provided in the supplemental material (Figure S1).

2-(3-thiopheneacetonitrile)-9-(1,8-oxybis(ethyleneoxyethyleneoxy)anthracene-10-one (**2**): 1.00 gram (0.92 mmol) of 3-thiopheneacetonitrile was stirred with 0.085 gram (0.21 mmol) of **1** and warmed to get a clear solution. 3 drops of 70% perchloric acid were added and stirred for 4 hrs. The precipitate was filtered and washed with 5 mL of diethyl ether and air-

dried. The entire crude product was dissolved in CH<sub>2</sub>Cl<sub>2</sub>-CH<sub>3</sub>OH (80:20) and diffused with diethyl ether. A yellow crystalline solid was obtained. Yield: 40 %. Melting point = 223 – 226 °C. Elemental Analyses calculated for C<sub>28</sub>H<sub>26</sub>O<sub>6</sub>NS: C, 66.52; H, 5.38, N, 2.77 %; Found: C, 65.90; H, 5.14; N, 2.88 %. <sup>1</sup>H NMR ([CD<sub>3</sub>]<sub>2</sub>CO, 25°C): δ 3.77 – 4.32 (m, 16H, CH<sub>2</sub>-O); 4.58 (s, 2H, CH<sub>2</sub>-CN); 6.34 (s, 1H, methine); 7.12 (d, 1H, thiophene); 7.25 (d, 2H, anthracenone); 7.42 (t, 2H, anthracenone); 7.52 (d, 1H, thiophene); 7.79 (d, 2H, anthracenone).

5-(2,2'-bithiophene)-9-(1,8-oxybis(ethyleneoxyethyleneoxy)anthracene-10-one (**3**): 0.2 g (0.5 mmol) of **1** and 0.0913 g (0.55 mmol) of 2,2'-bithiophene were mixed with 5 ml of benzonitrile. The solution was stirred for 15 minutes and 5 drops of sulfuric acid were added. The addition of sulfuric acid turned the solution light blue-green with continued stirring for 30 minutes. The benzonitrile solution was mixed with an excess (100 mL) of diethyl ether to precipitate the product. A cream-colored solid was obtained which was filtered off, washed with diethyl ether and air dried. Yield: ~40 %. Melting point = 270-275 °C. Elemental Analyses calculated for C<sub>30</sub>H<sub>28</sub>O<sub>6</sub>S<sub>2</sub>: C, 65.67; H, 5.14; Found: C, 65.64; H, 5.03 %. ESI MS calcd. for [C<sub>30</sub>H<sub>28</sub>O<sub>6</sub>S<sub>2</sub>]<sup>+</sup> 548.7 m/z; Found 549.0 m/z. <sup>1</sup>H NMR (CDCl<sub>3</sub>, 25°C): δ 3.70 – 4.30 (m, 16H, CH<sub>2</sub>-O); 6.32 (s, 1H, methine); 6.79 – 7.07 (m, 7H, 2H anthracenone + 5H bithiophene); 7.37 (t, 2H, anthracenone); 7.88 (d, 2H, anthracenone). <sup>13</sup>C NMR (CDCl<sub>3</sub>, 25°C): δ 33.1; 68.1; 69.3; 70.5; 71.1; 115.2; 119.4; 122.6; 122.8; 123.6; 127.3; 127.6; 128.1; 132.3; 133.0; 135.3; 137.9; 145.2; 155.6; 185.2.

Bis(9-(1,8-oxybis(ethyleneoxyethyleneoxy)anthracence-10-one)-5,5'-(2,2'-bithiophene)

(**4**): In an identical procedure substituting 0.5 equivalent of 2,2'-bithiophene (0.0457 g (0.275 mmol)) yields ~20 % of **4**. Melting point = 250 °C (dec). Elemental analyses calculated for C<sub>52</sub>H<sub>50</sub>O<sub>12</sub>S<sub>2</sub>: C, 67.08; H, 5.41 %. Found: C, 66.47; H, 5.16 %. ESI-MS calcd. for [C<sub>52</sub>H<sub>50</sub>O<sub>12</sub>S<sub>2</sub>]<sup>+</sup> 930.1 m/z; Found 931.1 m/z. <sup>1</sup>H NMR (CDCl<sub>3</sub>, 25°C): δ 3.66 – 4.23 (*m*, 32H, CH<sub>2</sub>-O); 6.28 (*s*, 2H, methine); 6.56 (*d*, 2H, thiophene); 6.88 (*d*, 2H, thiophene); 6.97 (*d*, 4H, anthracenone); 7.33 (*t*, 4H, anthracenone); 7.85 (*d*, 4H, anthracenone). <sup>13</sup>C NMR (CDCl<sub>3</sub>, 25°C): δ 68.0; 69.3; 70.4; 71.1; 115.2; 119.3; 127.6; 132.2; 155.6.

5-(2,2',5',2''-terthiophene)-9-(1,8-oxybis(ethyleneoxyethyleneoxy)anthracence-10-one (**5**): Compound **5** was synthesized in an identical manner to **3**, using 0.137 g (5.5 mmol) of 2,2',5',2''-terthiophene. Yield: ~60 %. Melting point = 255-258 °C. Elemental analyses calculated for C<sub>34</sub>H<sub>30</sub>O<sub>6</sub>S<sub>3</sub>: C, 64.74; H, 4.79 %. Found: C, 64.23; H, 4.62 %. <sup>1</sup>H NMR (CDCl<sub>3</sub>, 25°C): δ 3.79 – 4.30 (*m*, 16H, CH<sub>2</sub>-O); 6.37 (*s*, 1H, methine); 6.81 (*d*, 2H, thiophene); 6.92 – 7.18 (*m*, 7H, 2H anthracenone + 5H thiophene); 7.38 (*t*, 2H, anthracenone); 7.88 (*d*, 2H, anthracenone). <sup>13</sup>C NMR (CDCl<sub>3</sub>, 25°C): δ 67.9; 69.4; 70.5; 71.1; 115.2; 119.4; 122.6; 123.3; 124.2; 127.5; 127.8; 128.1; 132.3; 132.9; 145.2; 155.6.

Bis(9-(1,8-oxybis(ethyleneoxyethyleneoxy)anthracence-10-one)-5,5''-(2,2',5',2''-terthiophene) (**6**): 0.2 g (0.5 mmol) of **1** and 0.062 (0.275 mmol) of 2,2',5',2''-terthiophene were combined in ~5 mL of benzonitrile and yields ~70 % of **6**. Melting point = > 300 °C. Elemental analyses calculated for C<sub>56</sub>H<sub>52</sub>O<sub>12</sub>S<sub>3</sub>: C, 65.38; H, 5.17 %. Found: C, 65.34; H,

4.98 %.  $^1\text{H}$  NMR ( $\text{CDCl}_3$ ,  $25^\circ\text{C}$ ):  $\delta$  3.80 – 4.28 (*m*, 32H,  $\text{CH}_2\text{-O}$ ); 6.31 (*s*, 2H, methine); 6.70 (*s*, 2H, thiophene); 6.73 (*d*, 2H, thiophene); 6.89 (*d*, 2H, thiophene); 7.01 (*d*, 4H, anthracenone); 7.37 (*t*, 4H, anthracenone); 7.86 (*d*, 4H, anthracenone).  $^{13}\text{C}$  NMR ( $\text{CDCl}_3$ ,  $25^\circ\text{C}$ ):  $\delta$  32.4; 68.1; 69.4; 70.6; 71.2; 115.2; 119.4; 12.2; 128.1; 132.4; 155.6.

X-ray quality crystals were grown from  $\text{CH}_2\text{Cl}_2\text{:CH}_3\text{OH}$  mixture (4:1) and diffused with diethyl ether. Crystallographic data were collected at 100 K using  $\text{MoK}_\alpha$  radiation on a Bruker CCD APEXII diffractometer. Cell constants were determined after integration from typically more than 9,000 reflections.<sup>12</sup> Structures were solved by direct methods using SIR97<sup>13</sup> and refined using SHELXL-97.<sup>14</sup> Data reduction and refinement were completed using the WinGX suite of crystallographic software.<sup>15</sup> All hydrogen atoms were placed in ideal positions and refined as riding atoms with relative isotropic displacement parameters. For **6**, the terminal thiophene group is also disordered over two positions in a 2:1 ratio and both positions were refined isotropically. The larger occupancy has the thiophene sulfur atom (S3) facing away from S1 and S2. DFIX restraints were also applied for the thiophene with the lower occupancy. For **7**, the Platon-Squeeze function removed disordered solvent/excess reagent equaling a  $187 \text{ \AA}^3$  void and 62 electrons/cell ( $\text{C}_4\text{H}_4\text{NCH}_2\text{CH}_2\text{CN}$  starting material = 64 electrons).<sup>16</sup> Part of the cyclic polyether ring in **7** is also disordered over two positions in a 2:1 ratio; the smaller occupancy was refined isotropically. Table S1 below lists additional crystallographic and refinement information.

11. a) Stepien, M.; Szyszko, B.; Latos-Grazynski, L. *Org. Letts.* **2009**, *11*, 3930.    b) Zhang, Z.; Ferrence, G.M.; Lash, T.D. *Org. Letts.* **2009**, *11*, 101. c) Reddy, J.S.; Anand, V.G. *Chem. Commun.* **2008**, 1326.
12. SAINT V6.1, Bruker Analytical X-ray Systems, Madison, WI, **1999**.
13. A. Altomare, M. C. Burla, M. Camalli, G. L. Cascarano, C. Giacovazzo, A. Guagliardi, A. G. G. Moliterni, G. Polidori, R. Spagna, *J. Appl. Cryst.* **1999** *32*, 115.
14. SHELX97 - Programs for Crystal Structure Analysis (Release 97-2). G. M. Sheldrick, Institut für Anorganische Chemie der Universität, Tammanstrasse 4, D-3400 Göttingen, Germany, 1998.
15. WinGX: *An Integrated System of Windows Programs for the Solution, Refinement, and Analysis of Single Crystal X-ray Diffraction Data*, Ver. 1.70, Farrugia, L.J. *J. Appl. Cryst.* **1999**, *32*, 837.'
16. Spek, A.L. *J.Appl.Cryst.* **2003**, *36*, 7.

**Table S1.** Crystallographic collection and refinement data.

|                                                     | <b>2</b>                                          | <b>3</b>                                       | <b>4</b>                                                       | <b>5</b>                                                      | <b>7</b>                                                      |
|-----------------------------------------------------|---------------------------------------------------|------------------------------------------------|----------------------------------------------------------------|---------------------------------------------------------------|---------------------------------------------------------------|
| Empirical formula                                   | C <sub>28</sub> H <sub>27</sub> NO <sub>6</sub> S | C <sub>30</sub> H <sub>28</sub> O <sub>6</sub> | C <sub>52</sub> H <sub>50</sub> O <sub>12</sub> S <sub>2</sub> | C <sub>34</sub> H <sub>30</sub> O <sub>6</sub> S <sub>3</sub> | C <sub>29</sub> H <sub>30</sub> N <sub>2</sub> O <sub>6</sub> |
| Formula weight                                      | 505.57                                            | 548.64                                         | 931.06                                                         | 630.76                                                        | 502.50                                                        |
| Temperature, K                                      | 125(1)                                            | 100(1)                                         | 100(1)                                                         | 100(1)                                                        | 125(1)                                                        |
| Crystal system                                      | Triclinic                                         | Monoclinic                                     | Monoclinic                                                     | Orthorhombic                                                  | Triclinic                                                     |
| Space group                                         | P-1                                               | P 21/n                                         | P 21/c                                                         | Pna21                                                         | P-1                                                           |
| <i>a</i> , Å                                        | 9.6153(3)                                         | 8.2245(4)                                      | 13.554(4)                                                      | 20.811(2)                                                     | 10.044(3)                                                     |
| <i>b</i> , Å                                        | 11.8618(6)                                        | 17.4342(9)                                     | 11.791(3)                                                      | 17.747(2)                                                     | 13.134(5)                                                     |
| <i>c</i> , Å                                        | 12.3299(6)                                        | 18.3495(9)                                     | 14.702(4)                                                      | 8.0999(7)                                                     | 13.209(7)                                                     |
| $\alpha$ , °                                        | 64.011(1)                                         |                                                |                                                                |                                                               | 119.345(6)                                                    |
| $\beta$ , °                                         | 89.001(1)                                         | 92.703(1)                                      | 110.179(4)                                                     |                                                               | 102.449(7)                                                    |
| $\gamma$ , °                                        | 75.068(1)                                         |                                                |                                                                |                                                               | 99.743(5)                                                     |
| Volume, Å <sup>3</sup>                              | 1214                                              | 2628                                           | 2205                                                           | 2958                                                          | 1404                                                          |
| <i>Z</i>                                            | 2                                                 | 4                                              | 2                                                              | 4                                                             | 2                                                             |
| Density (calc)g.cm <sup>-3</sup>                    | 1.383                                             | 1.387                                          | 1.402                                                          | 1.416                                                         | 1.189                                                         |
| Absorb.coef.mm <sup>-1</sup>                        | 0.179                                             | 0.247                                          | 0.189                                                          | 0.298                                                         | 0.084                                                         |
| <i>F</i> (000)                                      | 532                                               | 1152                                           | 980                                                            | 1320                                                          | 532                                                           |
| $\theta$ range                                      | 1.85-25.05                                        | 1.61-25.00                                     | 2.27-25.00                                                     | 1.96-25.00                                                    | 1.79-25.05                                                    |
| Index ranges                                        | $\pm 11 \pm 14 \pm 14$                            | $\pm 9 \pm 20 \pm 21$                          | $\pm 16 \pm 14 \pm 17$                                         | $\pm 11 \pm 15 \pm 15$                                        | $\pm 11 \pm 15 \pm 15$                                        |
| Reflections collected                               | 12029                                             | 25448                                          | 21043                                                          | 28177                                                         | 13596                                                         |
| Independent reflections                             | 4304                                              | 4630                                           | 3876                                                           | 5212                                                          | 4954                                                          |
| Observed reflections                                | 3508                                              | 3692                                           | 2620                                                           | 4404                                                          | 2026                                                          |
| Max/Min trans.                                      | 0.922/0.974                                       | 0.885/0.973                                    | 0.963/0.991                                                    | 0.835/0.927                                                   | 0.974/0.995                                                   |
| Restr./ Param.                                      | 6/334                                             | 0/343                                          | 0/298                                                          | 7/385                                                         | 0/335                                                         |
| Goodness-of-fit                                     | 1.021                                             | 1.081                                          | 1.034                                                          | 1.051                                                         | 0.803                                                         |
| Final indices [ <i>I</i> > 2 $\sigma$ ( <i>I</i> )] | 0.0498                                            | 0.0427                                         | 0.0526                                                         | 0.0447                                                        | 0.0626                                                        |
| R indices (all data)                                | 0.1132                                            | 0.1140                                         | 0.1245                                                         | 0.1028                                                        | 0.1207                                                        |
| Peak/hole                                           | 0.66/-0.62                                        | 0.37/-0.48                                     | 0.79/-0.38                                                     | 0.44/-0.37                                                    | 0.35/-0.21                                                    |
| CCDC #                                              | 806525                                            | 806528                                         | 806527                                                         | 806529                                                        | 806526                                                        |

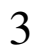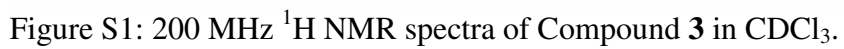

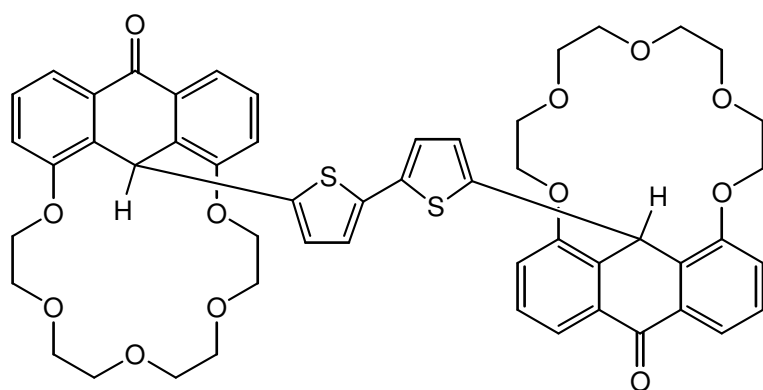

4

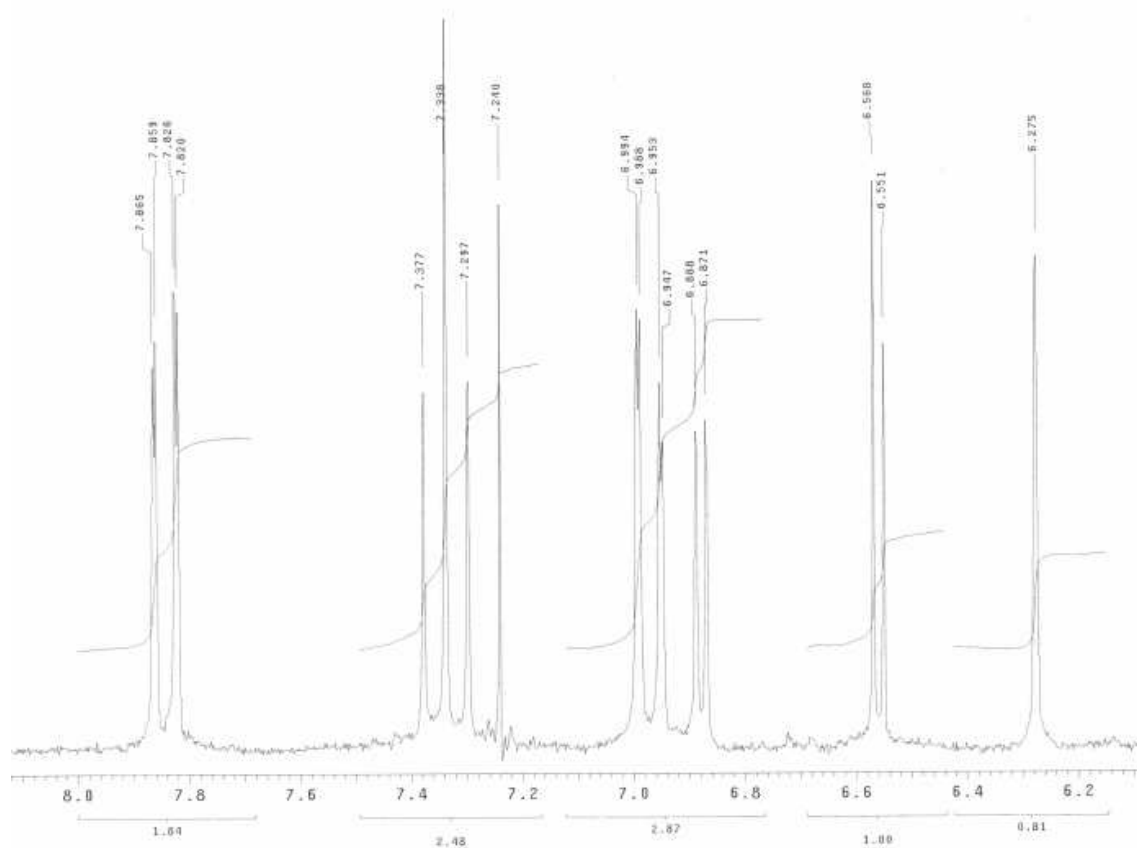

Figure S2: 200 MHz  $^1\text{H}$  NMR spectra of Compound **4** in  $\text{CDCl}_3$ .



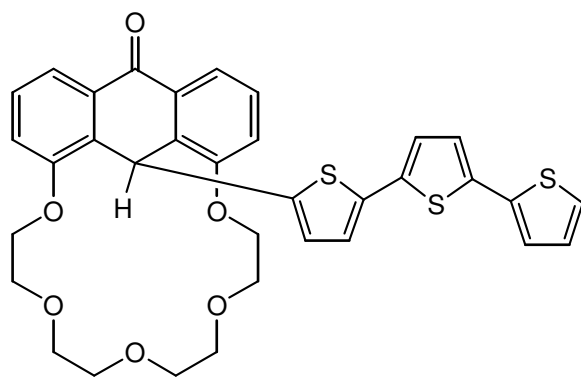

**5**

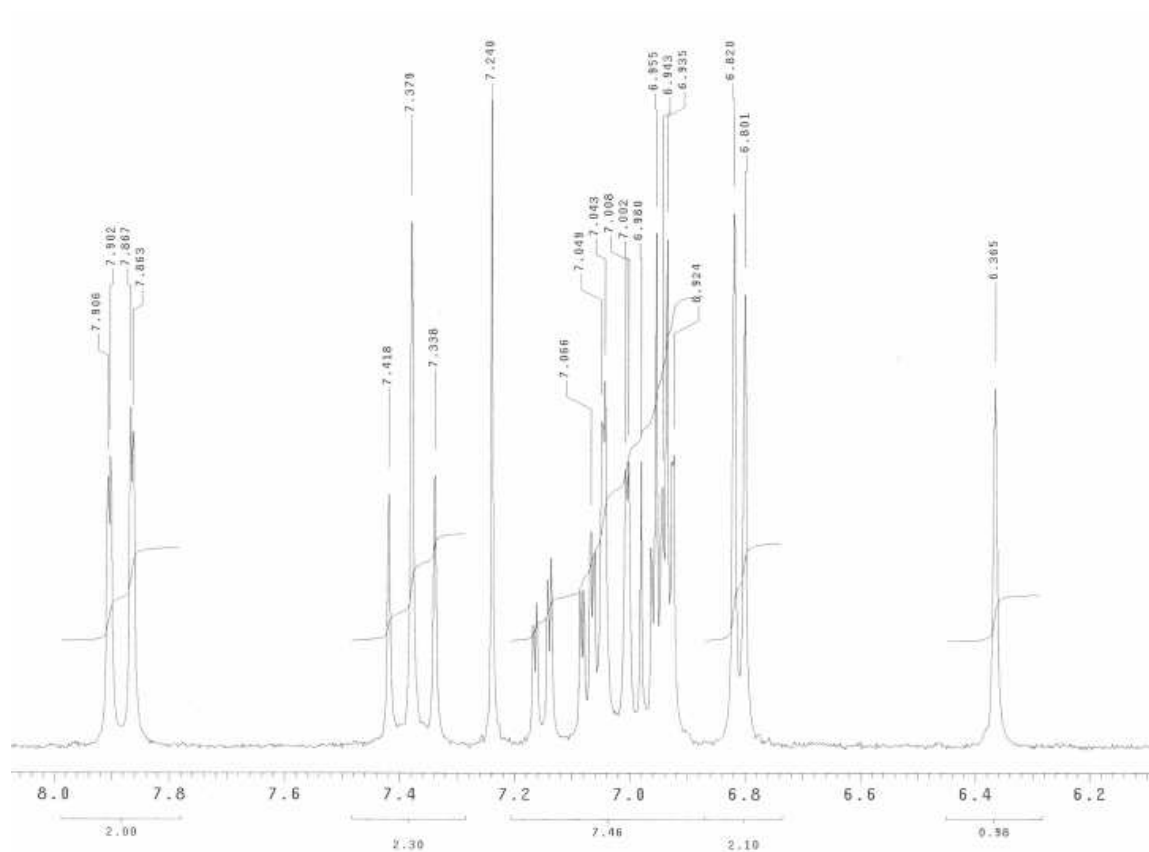

Figure S3: 200 MHz  $^1\text{H}$  NMR spectra of Compound **5** in  $\text{CDCl}_3$ .

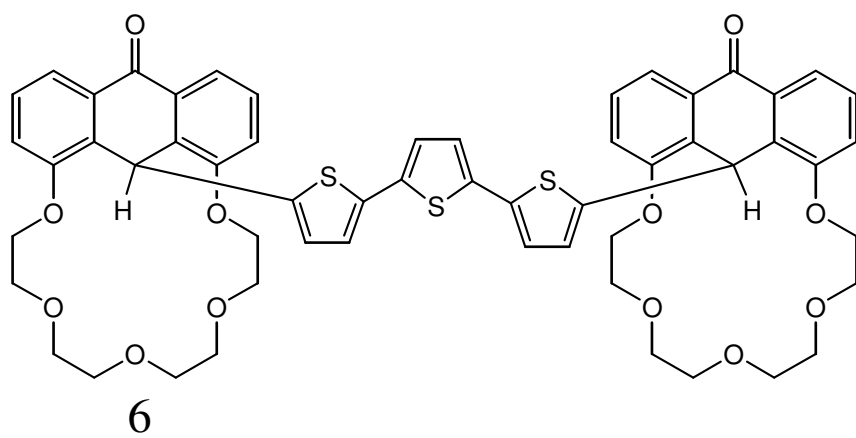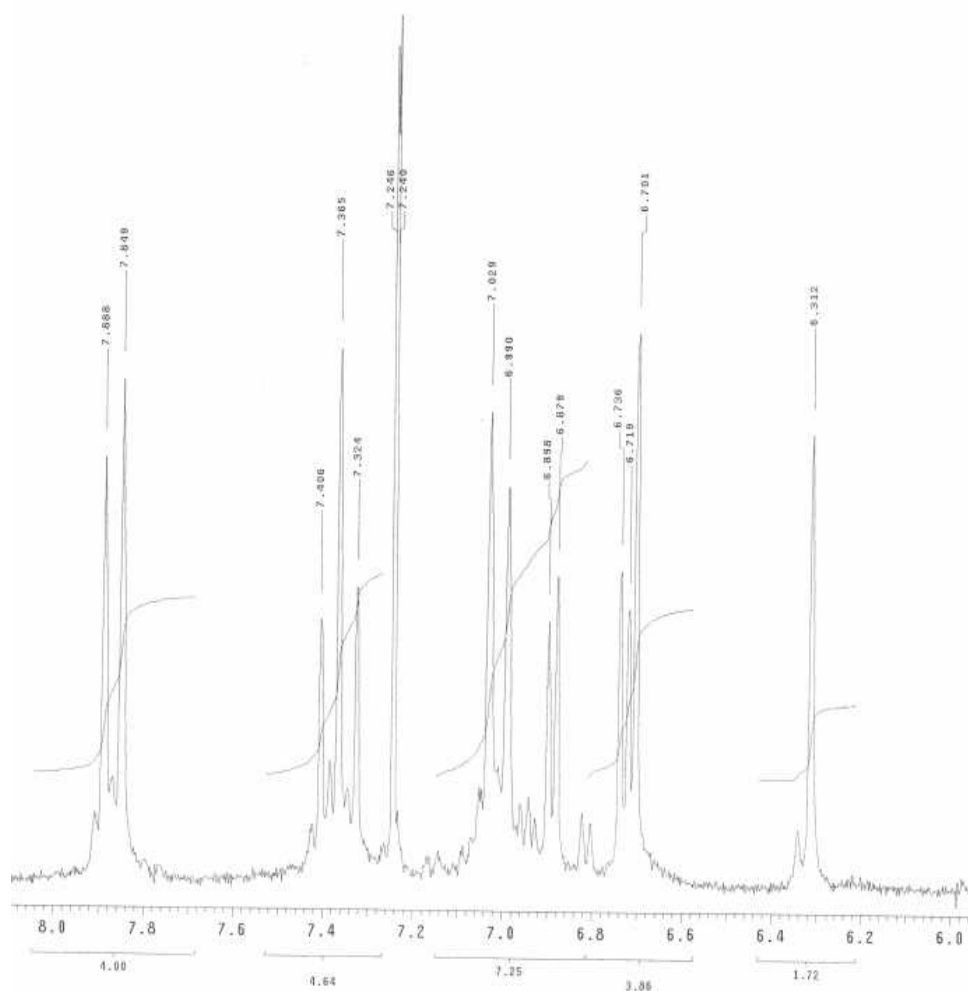

Figure S4: 200 MHz <sup>1</sup>H NMR spectra of Compound **6** in CDCl<sub>3</sub>.

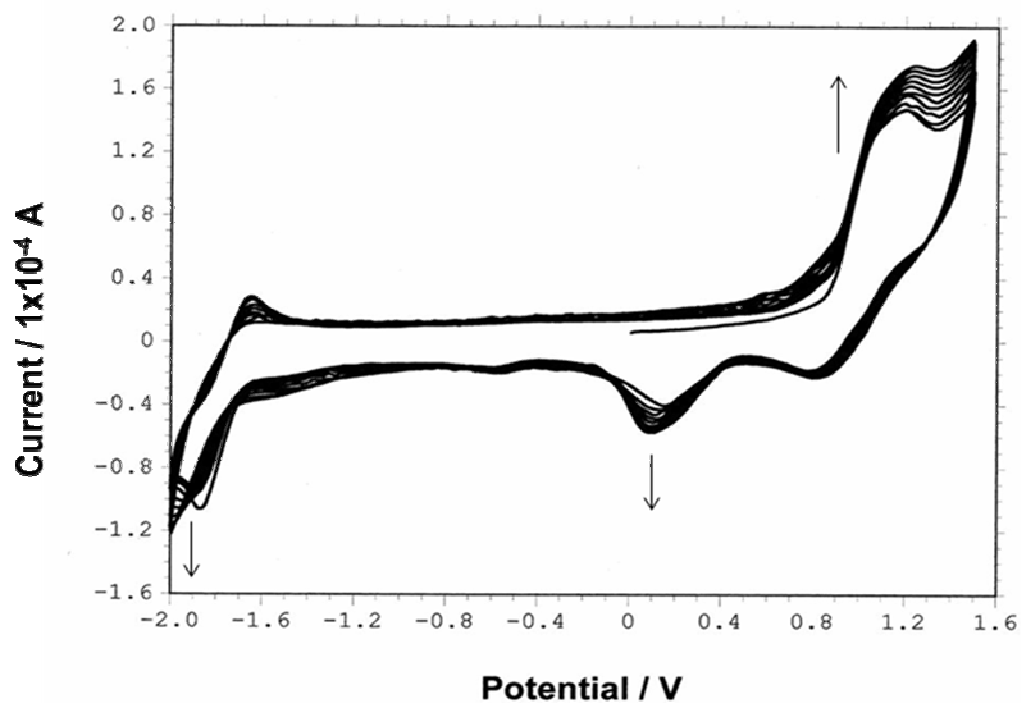

Figure S5. Cyclic voltammogram of the monosubstituted terthiophene adduct, compound **6**, showing film growth with repeated cycling on glassy carbon. 5 mM in 0.05 M TBAH/ $\text{CH}_2\text{Cl}_2$  vs. Ag/AgCl.

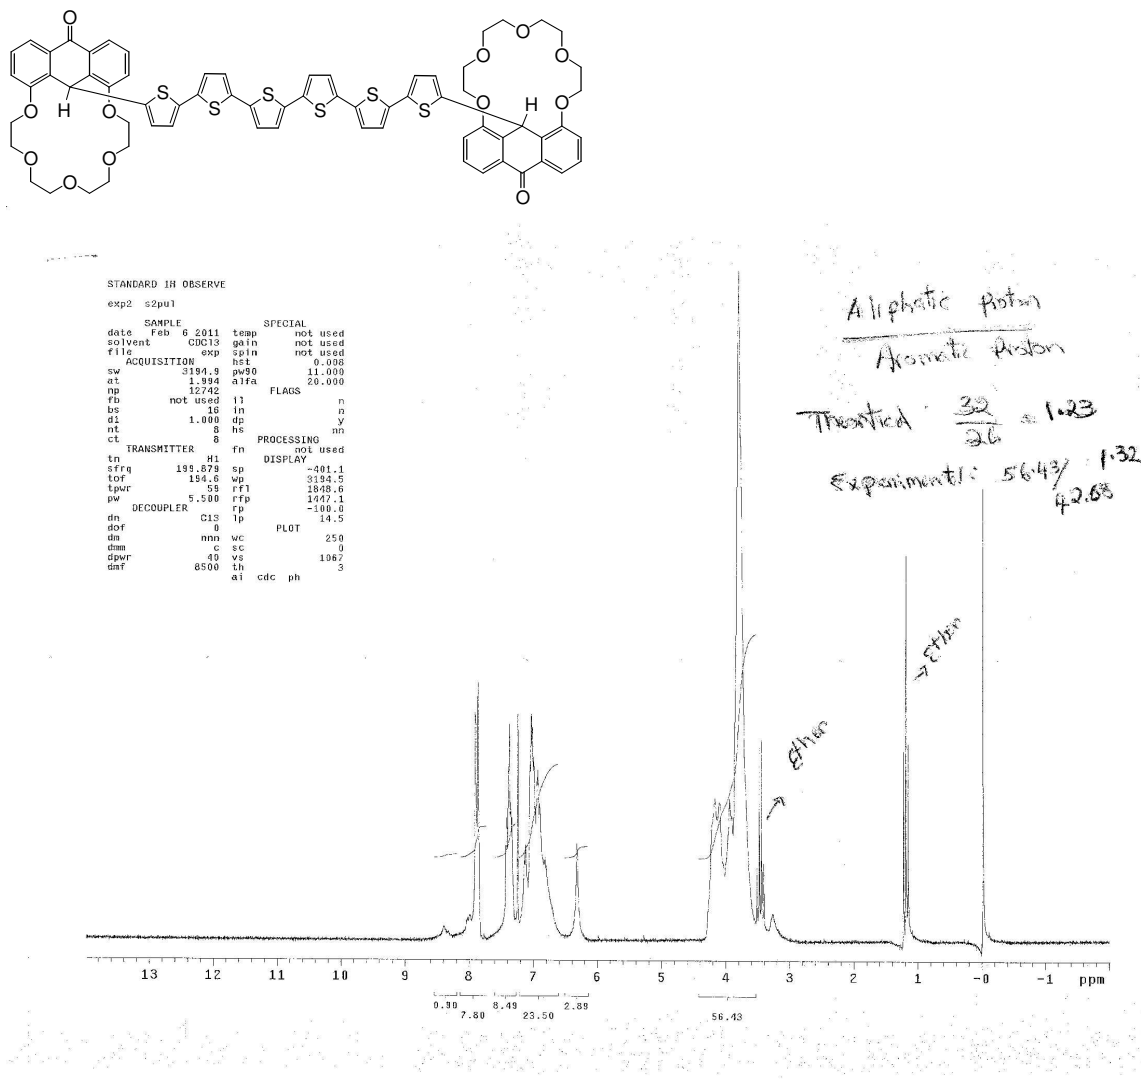

Figure S6. 200 MHz  $^1\text{H}$  NMR in  $\text{CDCl}_3$ . Reaction of compound 5 with  $\text{Fe(III)}$ .
